# Supplementary material for: Liver LXRα expression is crucial for whole body cholesterol homeostasis and reverse cholesterol transport in mice
Source: JCI journal article supplement (doi:10.1172/jci59817), 2012-04-09
Supplement: sd1 [file 1]

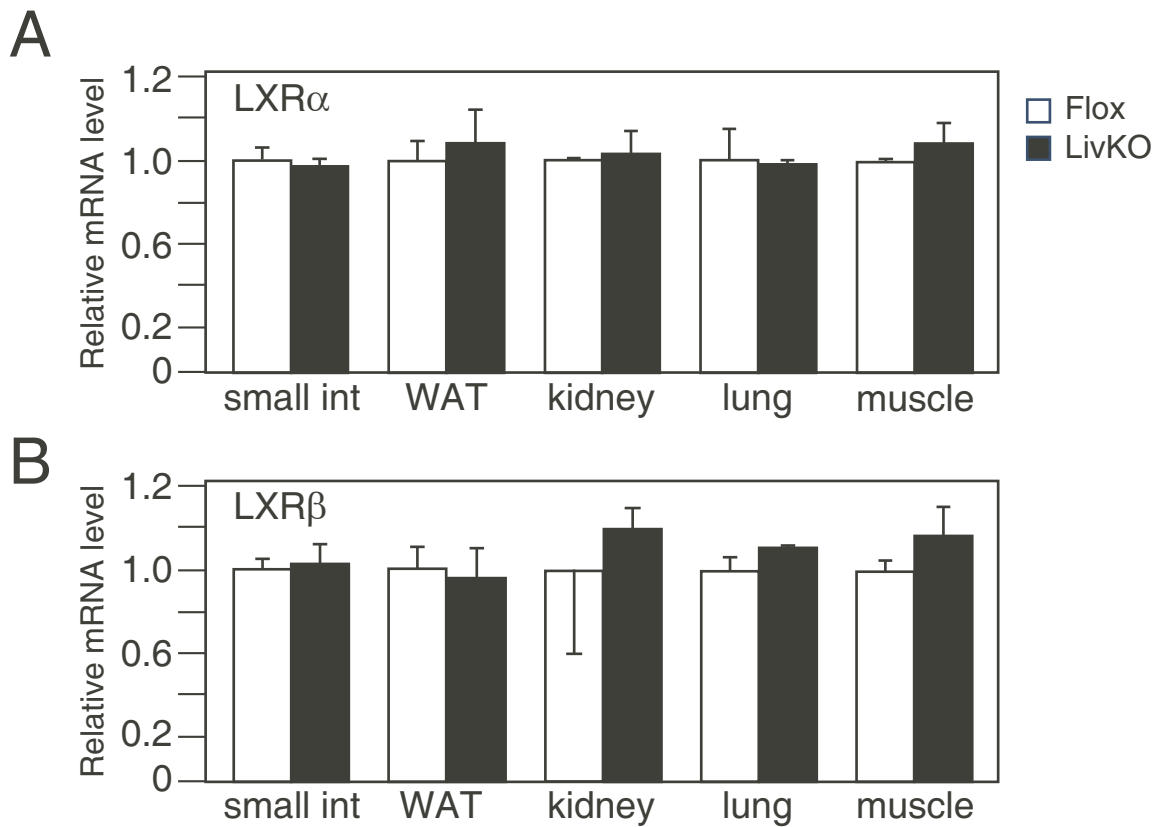

**Supplemental Figure 1. LXR expression in LivKO mice.** The mRNA levels of (A) LXR $\alpha$  and (B) LXR $\beta$  were determined by quantitative real-time PCR in tissues isolated from 2-4 month old mice maintained on a normal chow diet (n = 2-5). Expression of LXRs in floxed mice was set at 1 for each tissue.

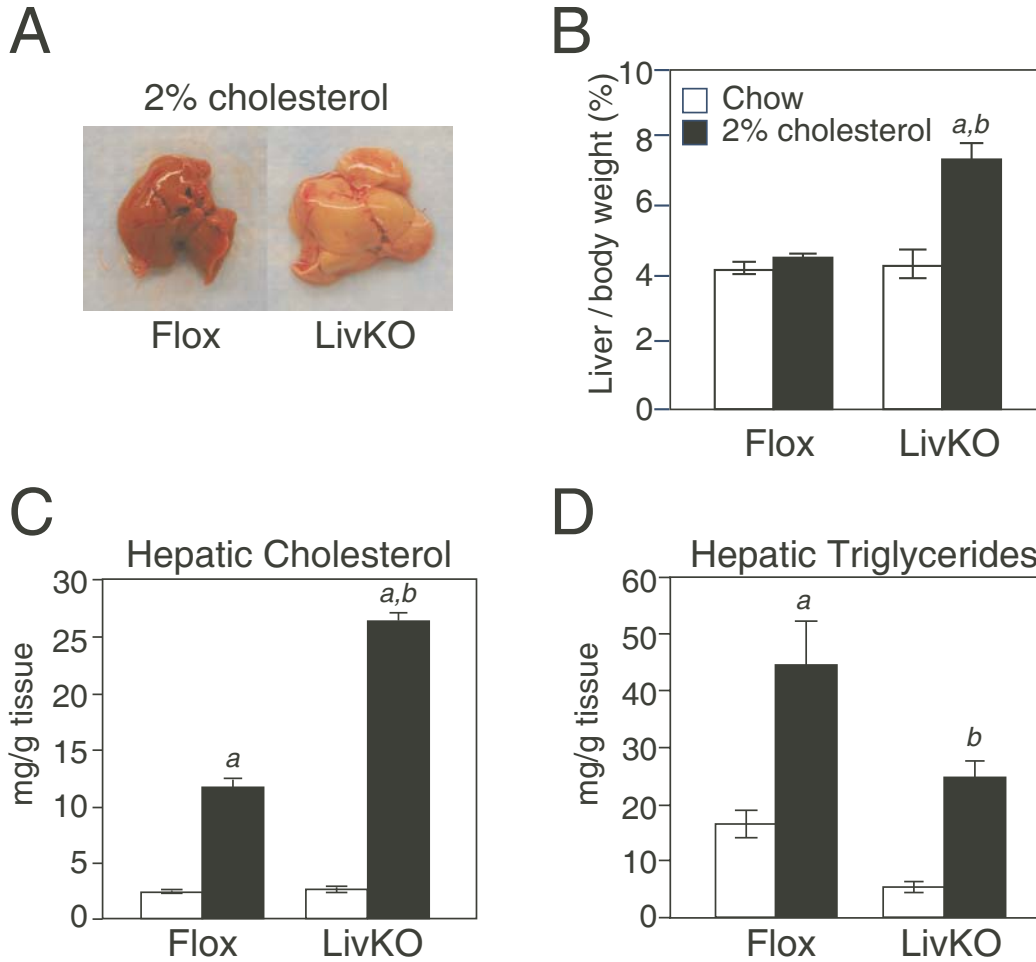

**Supplemental Figure 2. Hepatic lipid levels in LivKO mice.** Floxed and LivKO male mice 3 months old ( $n = 5$ ) were fed a 2% cholesterol diet for 30 days. **(A)** Representative appearance of the livers. **(B-D)** At completion of the study liver weights, hepatic cholesterol, and hepatic triglycerides levels were determined. Data are the mean  $\pm$  SEM. *a*, statistically significant difference between vehicle and T0901317 treated animals of the same genotype ( $p \leq 0.05$ ). *b*, statistically significant difference between Flox and LivKO mice with the same treatment ( $p \leq 0.05$ ).

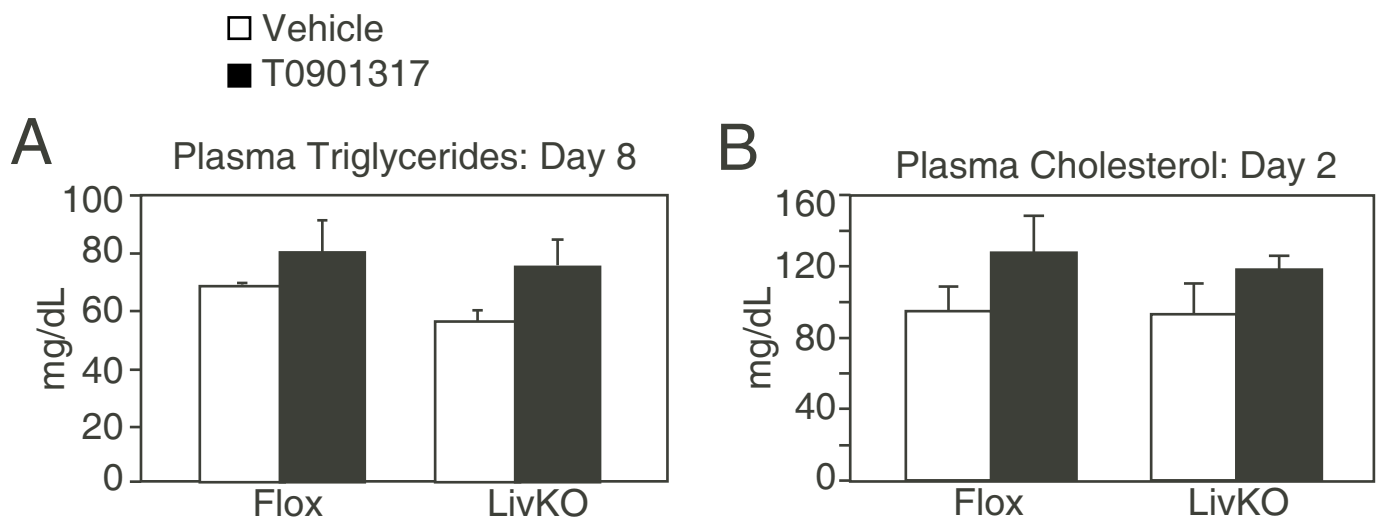

**Supplemental Figure 3. Plasma lipid levels.** Floxed and LivKO female mice 4-6 months old (n = 5-6) were fed a chow diet containing vehicle or T0901317 (40 mpk) for 8 days. Plasma triglycerides (**A**) at day 8 and cholesterol (**B**) at day 2 were determined enzymatically as described in the Methods. Data are the mean  $\pm$  SEM. No significant differences among groups were detected.

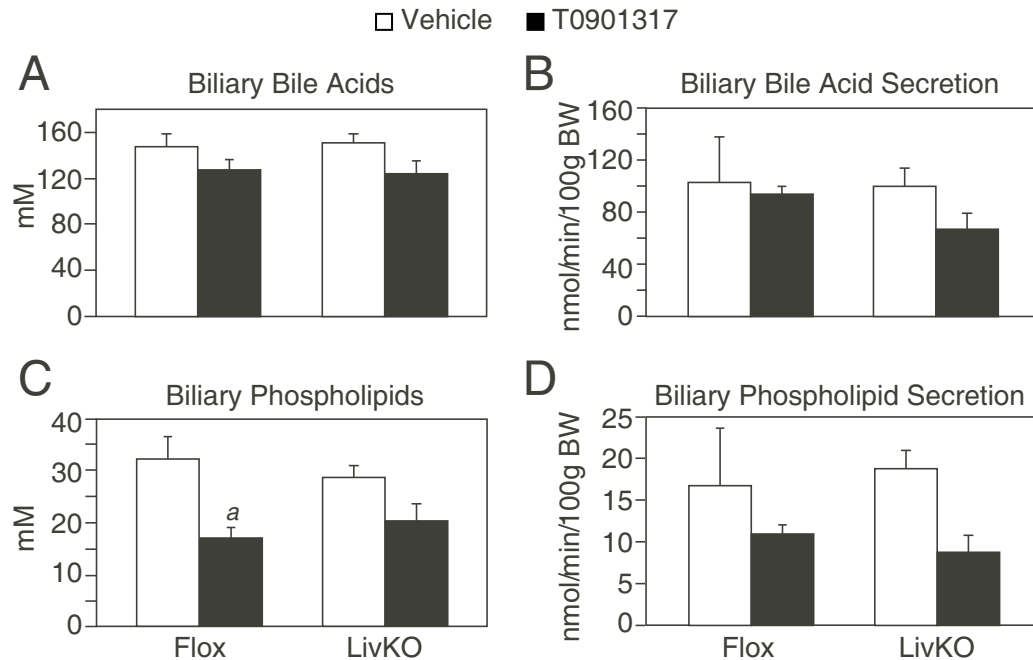

**Supplemental Figure 4. Biliary bile acids and phospholipids in LivKO mice.** Floxed and LivKO female mice 5-6 months old were fed a chow diet containing vehicle or T0901317 (40 mpk) for 3 days. (**A** and **C**) Gallbladder bile was collected and the concentration of bile acids (**A**) and phospholipids (**C**) were determined (n = 5-6). (**B** and **D**) Mice were anesthetized, the common bile duct was cannulated and bile flow was collected for 30 minutes. Biliary bile acids (**B**) and phospholipids (**D**) were measured (n = 3-6) and the secretion rate determined from measurement of the bile flow. Data are the mean ± SEM. *a*, statistically significant difference between vehicle and T0901317 treated animals of the same genotype ( $p \leq 0.05$ ). BW, body weight.

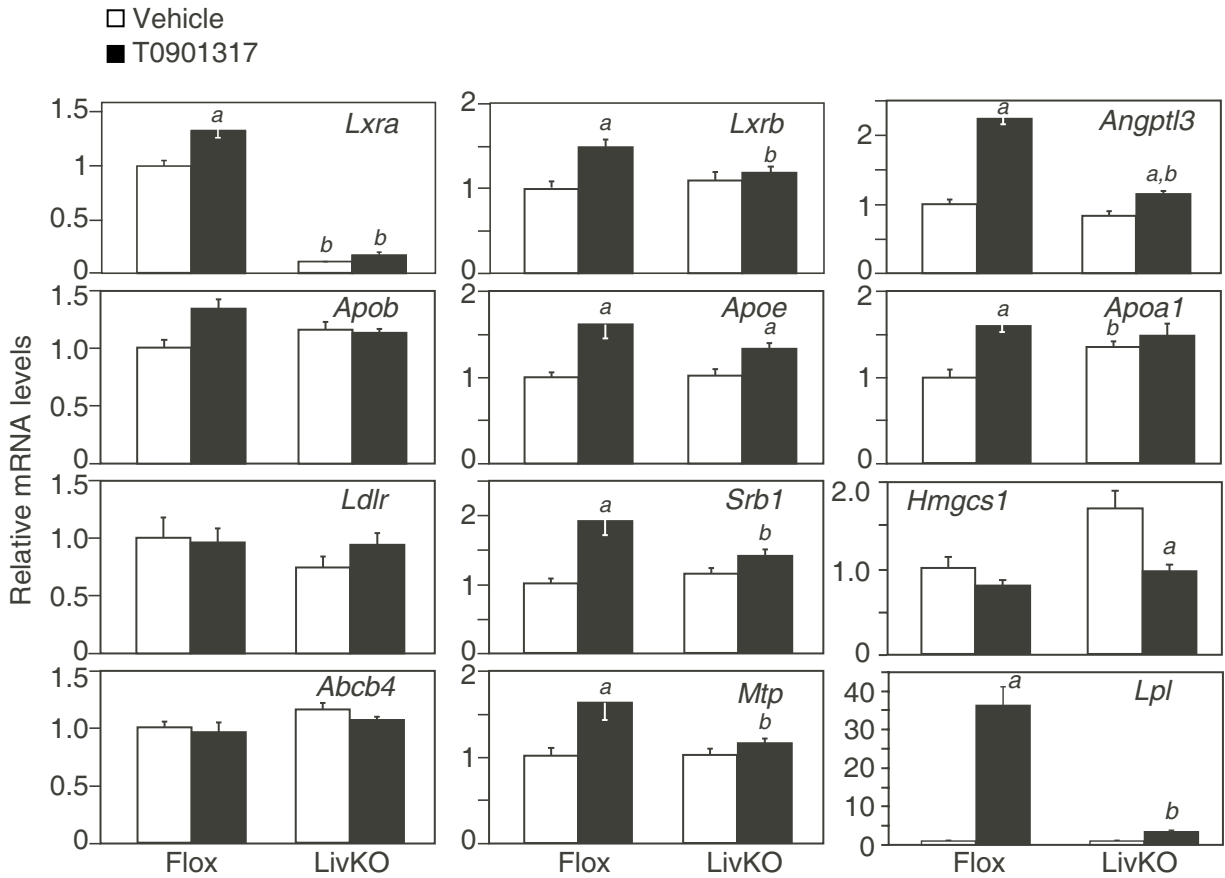

**Supplemental Figure 5. Liver gene expression.** Floxed and LivKO female mice 4-6 months old ( $n = 5-6$ ) were fed a chow diet containing vehicle or T0901317 (40 mpk) for 8 weeks. Liver samples were harvested at completion of the experiment and mRNA levels assayed by quantitative real-time PCR. Data are the mean  $\pm$  SEM. *a*, statistically significant difference between vehicle and T0901317 treated animals of the same genotype ( $p \leq 0.05$ ). *b*, statistically significant difference between Flox and LivKO mice with the same treatment ( $p \leq 0.05$ ).

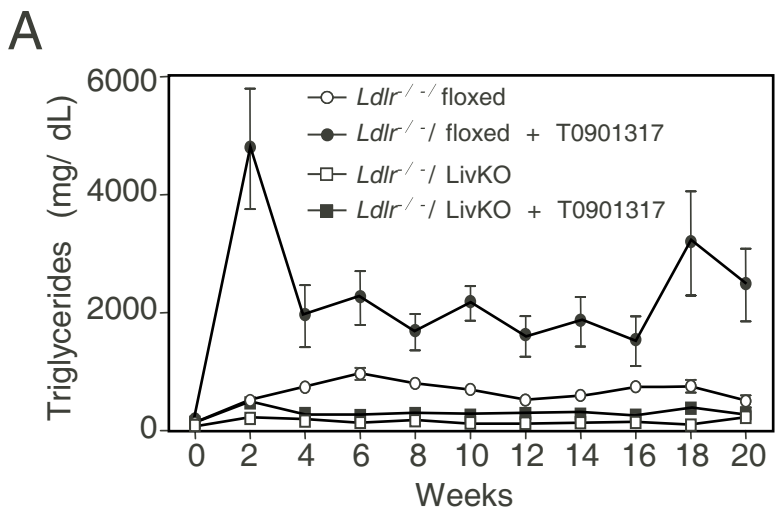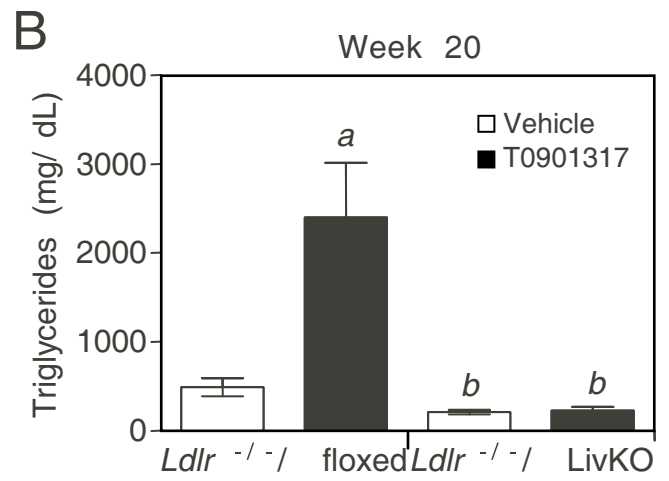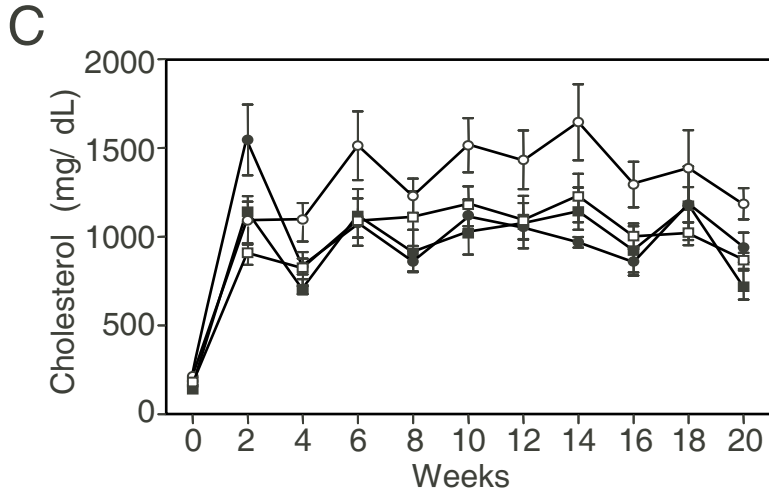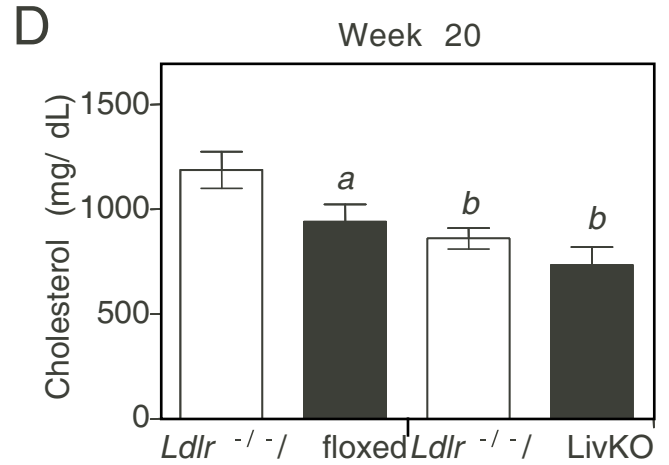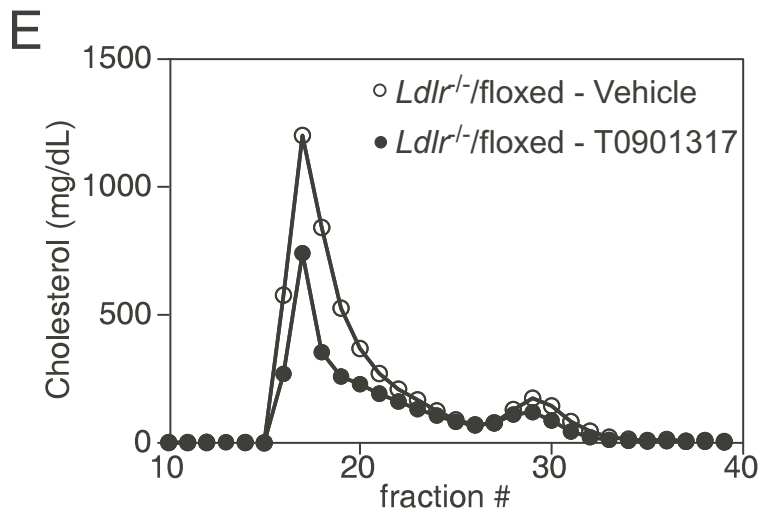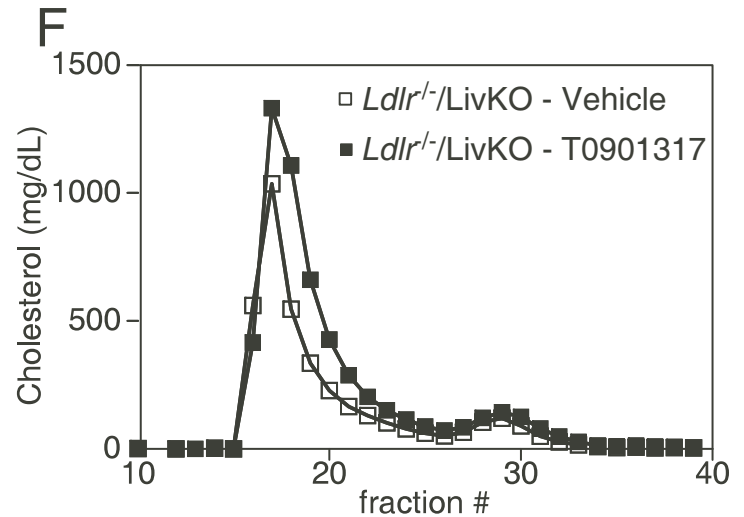

**Supplemental Figure 6. Plasma lipid levels in *Ldlr*<sup>-/-</sup>/LivKO mice.** *Ldlr*<sup>-/-</sup>/floxed and *Ldlr*<sup>-/-</sup>/LivKO mice were fed a Western diet with or without 0.01% T0901317 for 20 weeks and (A, B) plasma triglycerides and (C, D) plasma total cholesterol levels were determined at 2 week intervals (n = 5/group). Data are the mean ± SEM. a, statistically significant difference between vehicle and T0901317 treated animals of the same genotype ( $p \leq 0.05$ ). b, statistically significant difference between Flox and LivKO mice with the same treatment ( $p \leq 0.05$ ). *Ldlr*<sup>-/-</sup>/floxed (E) and *Ldlr*<sup>-/-</sup>/LivKO (F) mice were fed a Western diet with or without 0.01% T0901317 for 10 weeks and FPLC analysis was carried out using pooled plasma (n = 6/group) obtained from mice that had been fasted overnight. Elevated plasma triglycerides in samples from *Ldlr*<sup>-/-</sup>/floxed mice treated with T0901317 resulted in a significant amount of non-HDL aggregating when samples were centrifuges to pellet particulate matter prior to loading the FPLC column. therefore the non-HDL cholesterol levels measured by FPLC for *Ldlr*<sup>-/-</sup>/floxed mice treated with T0901317 is likely an underestimate.

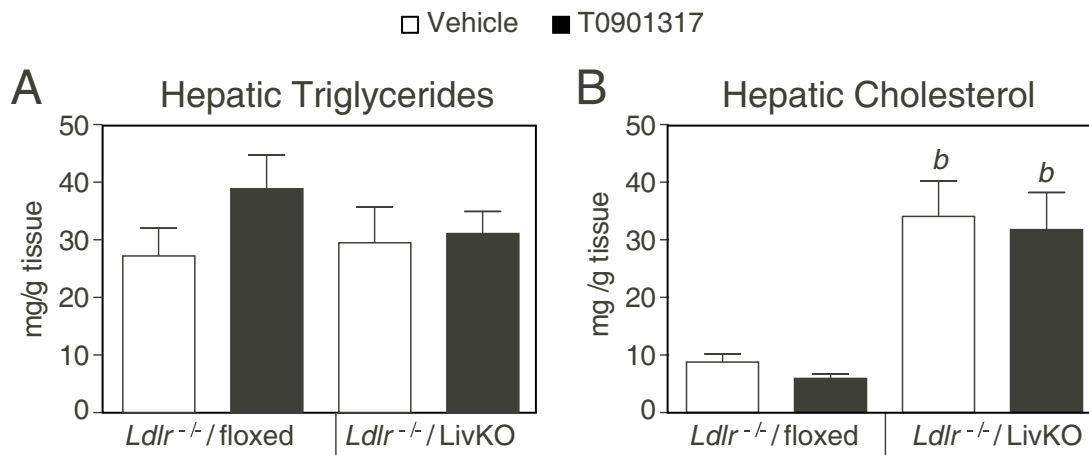

**Supplemental Figure 7. Hepatic lipid levels in *Ldlr*<sup>-/-</sup>/LivKO mice.** *Ldlr*<sup>-/-</sup>/floxed and *Ldlr*<sup>-/-</sup>/LivKO mice were fed a Western diet with or without 0.1% T0901317 for 20 weeks and hepatic (A) triglycerides and (B) cholesterol levels were determined at completion of the study (n = 5/ group; 3 male, 2 female). Data are the mean ± SEM. *b*, statistically significant difference between Flox and LivKO mice with the same treatment ( $p \leq 0.05$ ).

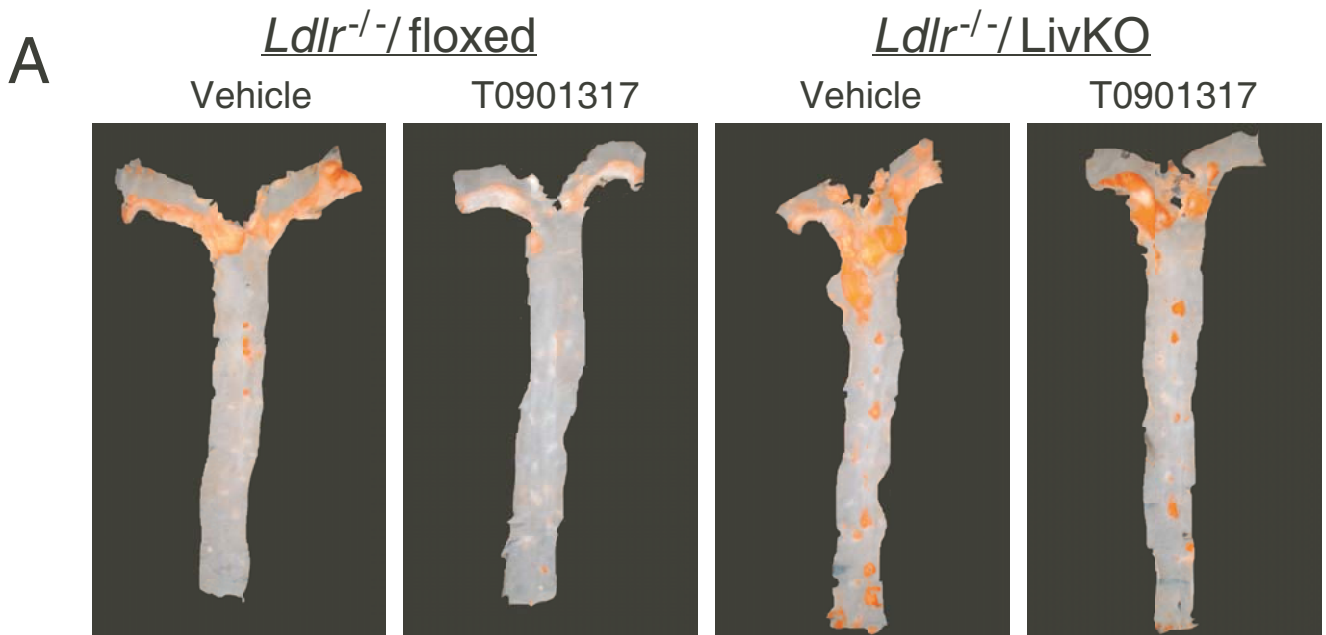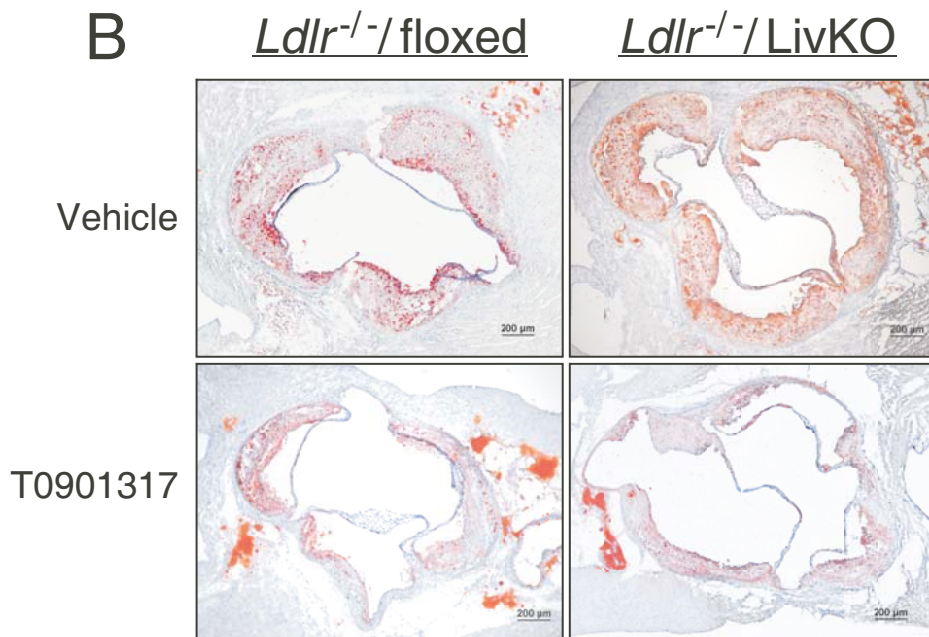

**Supplemental Figure 8. Representative en face and root section images.** Representative Sudan IV stained aortas (A) and oil red O stained aortic root sections (B).



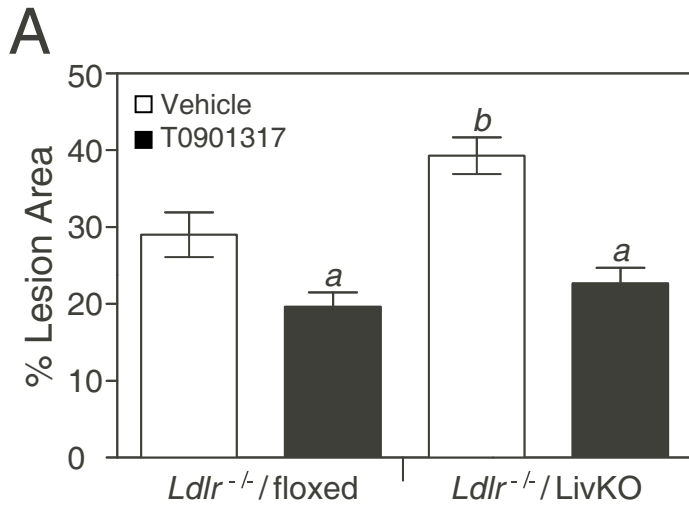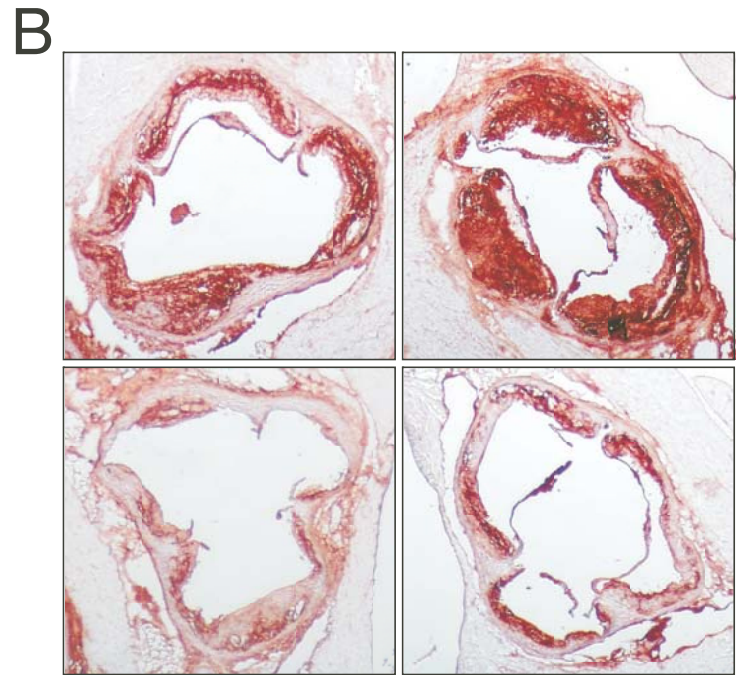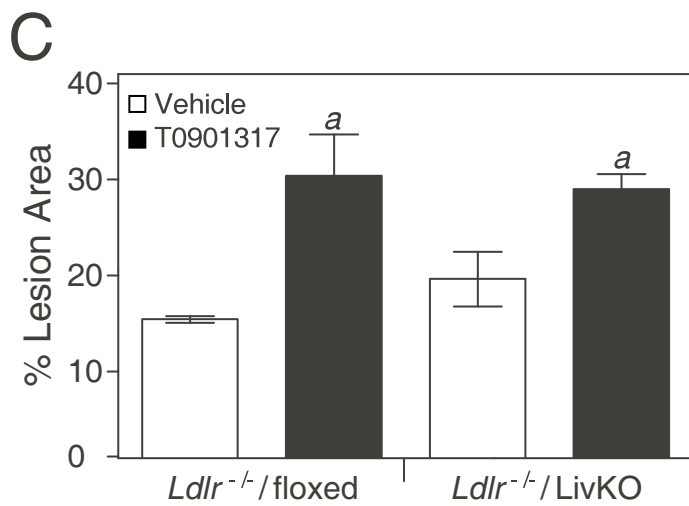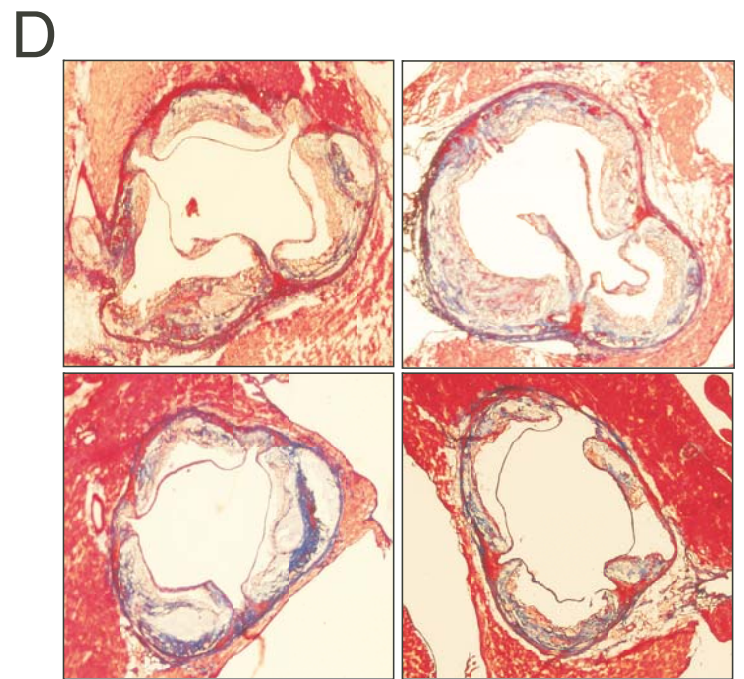

**Supplemental Figure 9. Macrophage and collagen staining.** Aortic root sections from *Ldlr*<sup>-/-</sup>/floxed and *Ldlr*<sup>-/-</sup>/LivKO mice fed a Western diet with or without 0.01% T0901317 for 20 weeks were stained with antibodies to MOMA-2 to detect macrophages (**A, B**) or with trichrome to detect collagen (**C, D**). Quantitation was carried out as described in the methods. Data are mean  $\pm$  SEM. *a*, statistically significant difference between vehicle and T0901317 treated animals of the same genotype ( $p \leq 0.05$ ). *b*, statistically significant difference between floxed and LivKO mice with the same treatment ( $p \leq 0.05$ ).

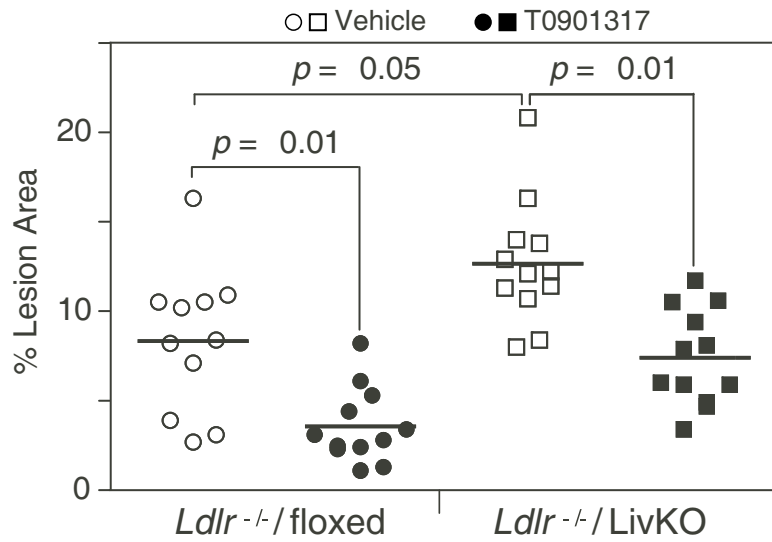

**Supplemental Figure 10. Atherosclerosis in  $Ldlr^{-/-}/\text{LivKO}$  mice.** Mice were fed a Western diet with or without 0.01% T0901317 for 10 weeks and atherosclerosis was quantitated by *en face* analysis as described in the Methods.  $Ldlr^{-/-}/\text{floxed}$  (vehicle n = 11; T0901317 n = 12).  $Ldlr^{-/-}/\text{LivKO}$  (vehicle n = 12; T0901317 n = 12).

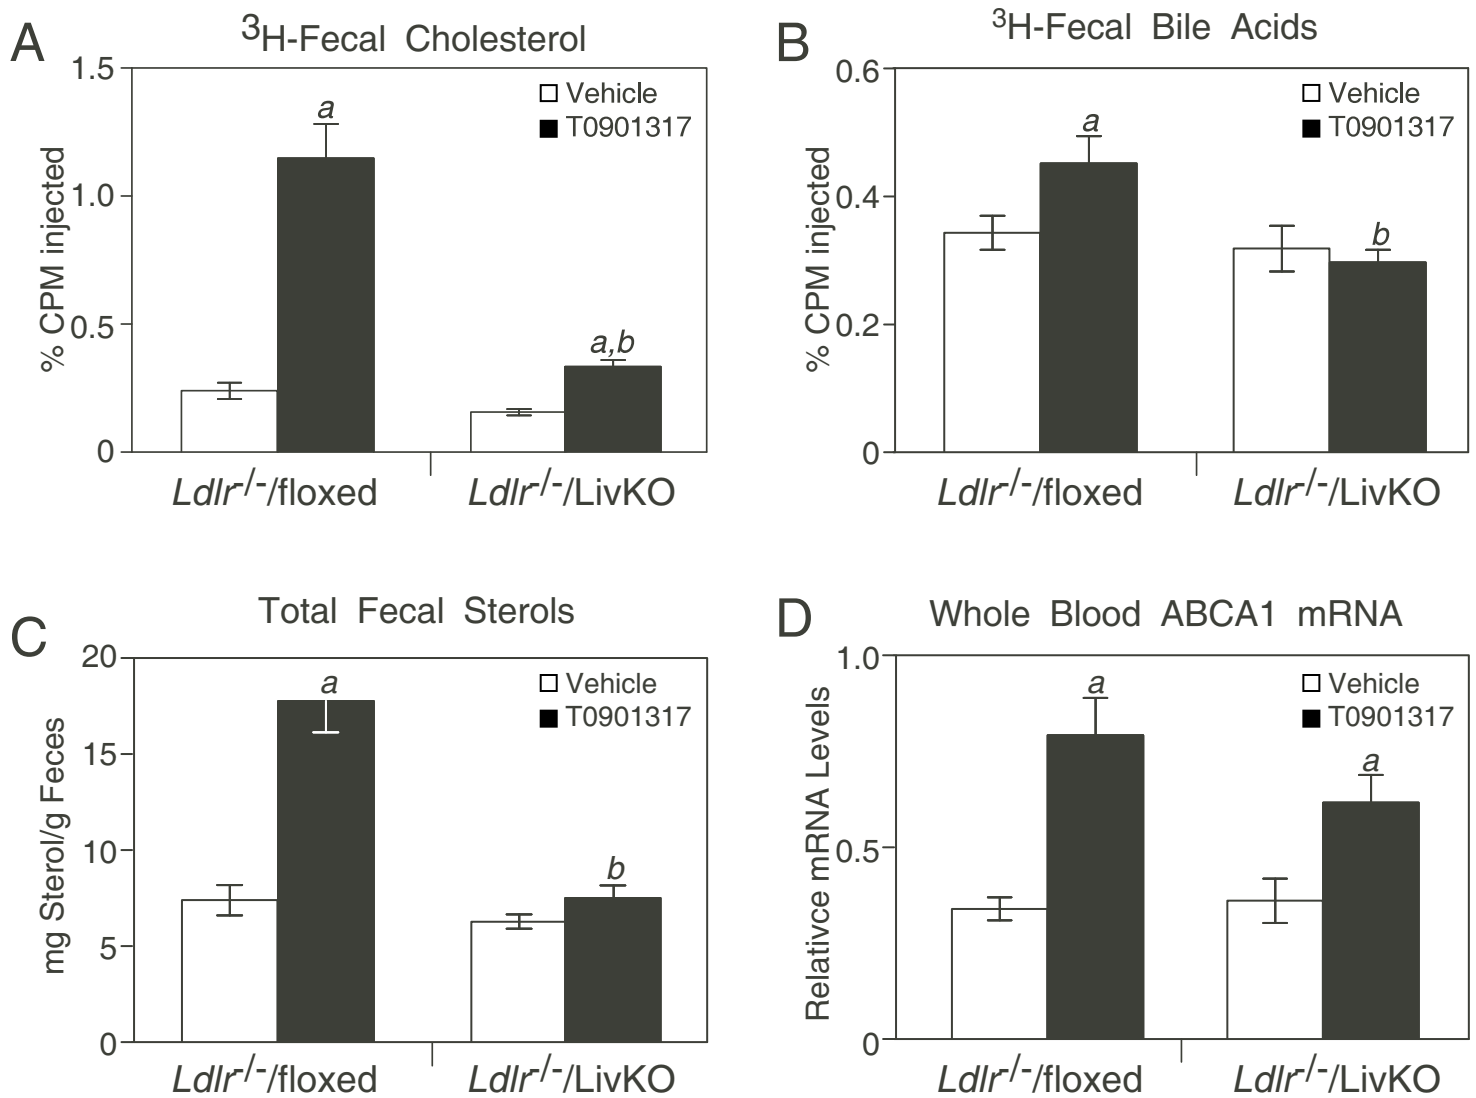

**Supplemental Figure 11. *In vivo* RCT, total fecal sterols and whole blood gene expression.** Mice were fed a Western diet with or without 0.01% T0901317 for 9 weeks. **(A, B)** *In vivo* RCT analysis was carried out as described in the methods (n =6/group) and the levels of <sup>3</sup>H-cholesterol **(A)** and <sup>3</sup>H-bile acids **(B)** was determined. **(C)** Total fecal sterols were determined as described in the methods from feces collected just prior to initiating the *in vivo* RCT experiment. **(D)** Total RNA was isolated from whole blood as described in the methods and the mRNA levels of ABCA1 was measured by quantitative real-time PCR. Data are mean  $\pm$  SEM. *a*, statistically significant difference between vehicle and T0901317 treated animals of the same genotype ( $p \leq 0.05$ ). *b*, statistically significant difference between floxed and LivKO mice with the same treatment ( $p \leq 0.05$ ).
